# Supplementary material for: Exploration of the Shared Gene and Molecular Mechanisms Between Endometriosis and Recurrent Pregnancy Loss
Source: Front Vet Sci. 2022 May 6;9:867405. doi: 10.3389/fvets.2022.867405 (PMC9120926; doi:10.3389/fvets.2022.867405)
Supplement: Supplementary Table 5 — GO term enrichment analysis results of shared genes. [file Table_5.XLSX]

## Sheet: Sheet1
ONTOLOGY	ID	Description	GeneRatio	BgRatio	pvalue	p.adjust	qvalue	geneID	Count
BP	GO:0140029	exocytic process	5/111	80/18670	0.000114398	0.229154	0.220924	RAB8B/STXBP2/SYT1/LYN/PRRT2	5
BP	GO:0006271	DNA strand elongation involved in DNA replication	3/111	20/18670	0.000216592	0.229154	0.220924	FEN1/MCM4/RFC4	3
BP	GO:0033260	nuclear DNA replication	4/111	60/18670	0.000446584	0.242773	0.234053	DACH1/FEN1/MCM4/RFC4	4
BP	GO:0022616	DNA strand elongation	3/111	27/18670	0.00053915	0.242773	0.234053	FEN1/MCM4/RFC4	3
BP	GO:0010633	negative regulation of epithelial cell migration	5/111	114/18670	0.000595385	0.242773	0.234053	MCC/MEF2C/JUP/ANGPT2/HDAC5	5
BP	GO:0044786	cell cycle DNA replication	4/111	71/18670	0.000846369	0.242773	0.234053	DACH1/FEN1/MCM4/RFC4	4
BP	GO:0048167	regulation of synaptic plasticity	6/111	187/18670	0.000883886	0.242773	0.234053	BAIAP2/MEF2C/PICK1/NRGN/SYNPO/PRRT2	6
BP	GO:0050804	modulation of chemical synaptic transmission	9/111	436/18670	0.00117631	0.242773	0.234053	BAIAP2/MEF2C/PICK1/PXK/SYT1/NPTXR/NRGN/SYNPO/PRRT2	9
BP	GO:0099177	regulation of trans-synaptic signaling	9/111	437/18670	0.00119517	0.242773	0.234053	BAIAP2/MEF2C/PICK1/PXK/SYT1/NPTXR/NRGN/SYNPO/PRRT2	9
BP	GO:0006260	DNA replication	7/111	274/18670	0.00125972	0.242773	0.234053	SLFN11/DACH1/DUT/FEN1/MCM4/RFC4/RBBP8	7
BP	GO:0043537	negative regulation of blood vessel endothelial cell migration	4/111	79/18670	0.00126205	0.242773	0.234053	MEF2C/JUP/ANGPT2/HDAC5	4
BP	GO:0071277	cellular response to calcium ion	4/111	83/18670	0.00151576	0.267278	0.257678	MEF2C/TRPM2/SYT1/FOSB	4
BP	GO:0072001	renal system development	7/111	293/18670	0.00184683	0.288913	0.278536	FSTL3/GLIS2/MEF2C/PTPRO/ITGB4/NUP107/ANGPT2	7
BP	GO:0051592	response to calcium ion	5/111	148/18670	0.00191152	0.288913	0.278536	MEF2C/TRPM2/STIM1/SYT1/FOSB	5
BP	GO:0006261	DNA-dependent DNA replication	5/111	153/18670	0.00220983	0.311733	0.300537	SLFN11/DACH1/FEN1/MCM4/RFC4	5
BP	GO:0005513	detection of calcium ion	2/111	13/18670	0.00261791	0.333851	0.321861	STIM1/SYT1	2
BP	GO:0010596	negative regulation of endothelial cell migration	4/111	97/18670	0.00268217	0.333851	0.321861	MEF2C/JUP/ANGPT2/HDAC5	4
BP	GO:0030099	myeloid cell differentiation	8/111	416/18670	0.00340691	0.365767	0.35263	FSTL3/LYAR/MEF2C/CD109/TMEM64/LYN/KLF2/LEO1	8
BP	GO:0001655	urogenital system development	7/111	330/18670	0.00358097	0.365767	0.35263	FSTL3/GLIS2/MEF2C/PTPRO/ITGB4/NUP107/ANGPT2	7
BP	GO:0007596	blood coagulation	7/111	336/18670	0.00395119	0.365767	0.35263	ENPP4/GNAQ/HPS5/F13A1/ENTPD2/LYN/METAP1	7
BP	GO:0099170	postsynaptic modulation of chemical synaptic transmission	2/111	16/18670	0.00398096	0.365767	0.35263	NRGN/SYNPO	2
BP	GO:0061005	cell differentiation involved in kidney development	3/111	54/18670	0.00406999	0.365767	0.35263	GLIS2/MEF2C/PTPRO	3
BP	GO:0090329	regulation of DNA-dependent DNA replication	3/111	54/18670	0.00406999	0.365767	0.35263	SLFN11/DACH1/RFC4	3
BP	GO:0007599	hemostasis	7/111	341/18670	0.00428137	0.365767	0.35263	ENPP4/GNAQ/HPS5/F13A1/ENTPD2/LYN/METAP1	7
BP	GO:0050817	coagulation	7/111	342/18670	0.00434984	0.365767	0.35263	ENPP4/GNAQ/HPS5/F13A1/ENTPD2/LYN/METAP1	7
BP	GO:0099010	modification of postsynaptic structure	2/111	17/18670	0.0044943	0.365767	0.35263	BAIAP2/SYNPO	2
BP	GO:0071248	cellular response to metal ion	5/111	190/18670	0.00556398	0.436051	0.42039	FSTL3/MEF2C/TRPM2/SYT1/FOSB	5
BP	GO:0032835	glomerulus development	3/111	62/18670	0.00599648	0.439587	0.423798	MEF2C/PTPRO/ANGPT2	3
BP	GO:0001822	kidney development	6/111	278/18670	0.00635498	0.439587	0.423798	FSTL3/GLIS2/MEF2C/PTPRO/NUP107/ANGPT2	6
BP	GO:0048278	vesicle docking	3/111	64/18670	0.00654963	0.439587	0.423798	RAB8B/STXBP2/SYT1	3
BP	GO:0071498	cellular response to fluid shear stress	2/111	21/18670	0.0068331	0.439587	0.423798	MEF2C/KLF2	2
BP	GO:0002548	monocyte chemotaxis	3/111	65/18670	0.00683722	0.439587	0.423798	PTPRO/LYN/PLA2G7	3
BP	GO:0002576	platelet degranulation	4/111	128/18670	0.00717921	0.439587	0.423798	STXBP2/CD109/F13A1/LYN	4
BP	GO:0002573	myeloid leukocyte differentiation	5/111	204/18670	0.0074663	0.439587	0.423798	FSTL3/MEF2C/CD109/TMEM64/LYN	5
BP	GO:0031629	synaptic vesicle fusion to presynaptic active zone membrane	2/111	22/18670	0.0074874	0.439587	0.423798	SYT1/PRRT2	2
BP	GO:0045117	azole transport	2/111	22/18670	0.0074874	0.439587	0.423798	SLC25A29/LYN	2
BP	GO:0045765	regulation of angiogenesis	7/111	383/18670	0.00794292	0.439587	0.423798	CREB3L1/RAMP2/JUP/STIM1/ANGPT2/HDAC5/KLF2	7
BP	GO:0051271	negative regulation of cellular component movement	7/111	384/18670	0.00805165	0.439587	0.423798	MCC/MEF2C/PTPRO/DACH1/JUP/ANGPT2/HDAC5	7
BP	GO:0099500	vesicle fusion to plasma membrane	2/111	23/18670	0.00816886	0.439587	0.423798	SYT1/PRRT2	2
BP	GO:0099563	modification of synaptic structure	2/111	24/18670	0.00887712	0.439587	0.423798	BAIAP2/SYNPO	2
BP	GO:0044766	multi-organism transport	3/111	73/18670	0.00940822	0.439587	0.423798	VPS37B/IFIT1/NUP107	3
BP	GO:1902579	multi-organism localization	3/111	73/18670	0.00940822	0.439587	0.423798	VPS37B/IFIT1/NUP107	3
BP	GO:0040013	negative regulation of locomotion	7/111	396/18670	0.00944401	0.439587	0.423798	MCC/MEF2C/PTPRO/DACH1/JUP/ANGPT2/HDAC5	7
BP	GO:0071241	cellular response to inorganic substance	5/111	217/18670	0.00960184	0.439587	0.423798	FSTL3/MEF2C/TRPM2/SYT1/FOSB	5
BP	GO:0090025	regulation of monocyte chemotaxis	2/111	25/18670	0.00961186	0.439587	0.423798	LYN/PLA2G7	2
BP	GO:0097186	amelogenesis	2/111	25/18670	0.00961186	0.439587	0.423798	ITGB4/STIM1	2
BP	GO:1903671	negative regulation of sprouting angiogenesis	3/111	74/18670	0.00976398	0.439587	0.423798	CREB3L1/HDAC5/KLF2	3
BP	GO:0072006	nephron development	4/111	142/18670	0.0102584	0.452225	0.435983	MEF2C/PTPRO/NUP107/ANGPT2	4
BP	GO:0032201	telomere maintenance via semi-conservative replication	2/111	27/18670	0.0111594	0.473174	0.456179	FEN1/RFC4	2
BP	GO:0034368	protein-lipid complex remodeling	2/111	28/18670	0.0119716	0.473174	0.456179	LCAT/PLA2G7	2
BP	GO:0034369	plasma lipoprotein particle remodeling	2/111	28/18670	0.0119716	0.473174	0.456179	LCAT/PLA2G7	2
BP	GO:2000108	positive regulation of leukocyte apoptotic process	2/111	28/18670	0.0119716	0.473174	0.456179	MEF2C/LYN	2
BP	GO:0043462	regulation of ATPase activity	3/111	80/18670	0.0120625	0.473174	0.456179	PXK/TMEM64/ATP1B2	3
BP	GO:1903900	regulation of viral life cycle	4/111	149/18670	0.0120753	0.473174	0.456179	VPS37B/IFIT1/TRIM59/TRIM6	4
BP	GO:0034109	homotypic cell-cell adhesion	3/111	81/18670	0.0124732	0.47343	0.456426	JUP/LYN/METAP1	3
BP	GO:0034367	protein-containing complex remodeling	2/111	29/18670	0.0128089	0.47343	0.456426	LCAT/PLA2G7	2
BP	GO:1901342	regulation of vasculature development	7/111	422/18670	0.0130559	0.47343	0.456426	CREB3L1/RAMP2/JUP/STIM1/ANGPT2/HDAC5/KLF2	7
BP	GO:0016050	vesicle organization	6/111	325/18670	0.0130925	0.47343	0.456426	ACRBP/RAB8B/VPS37B/RAB38/SYT1/PRRT2	6
BP	GO:0030168	platelet activation	4/111	153/18670	0.0132006	0.47343	0.456426	GNAQ/ENTPD2/LYN/METAP1	4
BP	GO:0001782	B cell homeostasis	2/111	30/18670	0.0136711	0.478991	0.461787	MEF2C/LYN	2
BP	GO:0043535	regulation of blood vessel endothelial cell migration	4/111	156/18670	0.014087	0.478991	0.461787	MEF2C/JUP/ANGPT2/HDAC5	4
BP	GO:1903901	negative regulation of viral life cycle	3/111	85/18670	0.0141956	0.478991	0.461787	IFIT1/TRIM59/TRIM6	3
BP	GO:0031338	regulation of vesicle fusion	2/111	31/18670	0.0145577	0.478991	0.461787	SYT1/PRRT2	2
BP	GO:0043304	regulation of mast cell degranulation	2/111	31/18670	0.0145577	0.478991	0.461787	STXBP2/LYN	2
BP	GO:0030336	negative regulation of cell migration	6/111	334/18670	0.0148016	0.478991	0.461787	MCC/MEF2C/DACH1/JUP/ANGPT2/HDAC5	6
BP	GO:0033006	regulation of mast cell activation involved in immune response	2/111	32/18670	0.0154686	0.478991	0.461787	STXBP2/LYN	2
BP	GO:0060021	roof of mouth development	3/111	89/18670	0.0160465	0.478991	0.461787	CSRNP1/MEF2C/PRRX1	3
BP	GO:0036003	positive regulation of transcription from RNA polymerase II promoter in response to stress	2/111	33/18670	0.0164034	0.478991	0.461787	CREB3L1/KLF2	2
BP	GO:0048821	erythrocyte development	2/111	33/18670	0.0164034	0.478991	0.461787	LYAR/KLF2	2
BP	GO:0071674	mononuclear cell migration	3/111	90/18670	0.0165294	0.478991	0.461787	PTPRO/LYN/PLA2G7	3
BP	GO:0045638	negative regulation of myeloid cell differentiation	3/111	91/18670	0.0170205	0.478991	0.461787	FSTL3/LYN/LEO1	3
BP	GO:0045637	regulation of myeloid cell differentiation	5/111	251/18670	0.0170954	0.478991	0.461787	FSTL3/MEF2C/TMEM64/LYN/LEO1	5
BP	GO:0007603	phototransduction, visible light	2/111	34/18670	0.0173617	0.478991	0.461787	GNAQ/METAP1	2
BP	GO:2000146	negative regulation of cell motility	6/111	349/18670	0.017986	0.478991	0.461787	MCC/MEF2C/DACH1/JUP/ANGPT2/HDAC5	6
BP	GO:0015695	organic cation transport	2/111	35/18670	0.0183433	0.478991	0.461787	SLC22A18/SLC25A29	2
BP	GO:0033363	secretory granule organization	2/111	35/18670	0.0183433	0.478991	0.461787	ACRBP/RAB38	2
BP	GO:0140056	organelle localization by membrane tethering	4/111	169/18670	0.0183612	0.478991	0.461787	RAB8B/STXBP2/SYT1/PDZD8	4
BP	GO:0006906	vesicle fusion	3/111	94/18670	0.0185423	0.478991	0.461787	RAB8B/SYT1/PRRT2	3
BP	GO:0060337	type I interferon signaling pathway	3/111	95/18670	0.0190658	0.478991	0.461787	IFIT3/IFIT1/TRIM6	3
BP	GO:0071357	cellular response to type I interferon	3/111	95/18670	0.0190658	0.478991	0.461787	IFIT3/IFIT1/TRIM6	3
BP	GO:0050931	pigment cell differentiation	2/111	36/18670	0.0193478	0.478991	0.461787	MEF2C/RAB38	2
BP	GO:0006874	cellular calcium ion homeostasis	7/111	458/18670	0.019573	0.478991	0.461787	TRPM2/NOL3/STIM1/TMEM64/LYN/PDZD8/SYNPO	7
BP	GO:0016525	negative regulation of angiogenesis	4/111	173/18670	0.0198216	0.478991	0.461787	CREB3L1/ANGPT2/HDAC5/KLF2	4
BP	GO:0030316	osteoclast differentiation	3/111	97/18670	0.0201374	0.478991	0.461787	FSTL3/CD109/TMEM64	3
BP	GO:0006623	protein targeting to vacuole	2/111	37/18670	0.020375	0.478991	0.461787	AP3M1/VPS37B	2
BP	GO:0034405	response to fluid shear stress	2/111	37/18670	0.020375	0.478991	0.461787	MEF2C/KLF2	2
BP	GO:2000249	regulation of actin cytoskeleton reorganization	2/111	37/18670	0.020375	0.478991	0.461787	BAIAP2/TRPM2	2
BP	GO:2000181	negative regulation of blood vessel morphogenesis	4/111	175/18670	0.020578	0.478991	0.461787	CREB3L1/ANGPT2/HDAC5/KLF2	4
BP	GO:0043473	pigmentation	3/111	98/18670	0.0206854	0.478991	0.461787	HPS5/MEF2C/RAB38	3
BP	GO:0034340	response to type I interferon	3/111	99/18670	0.0212416	0.478991	0.461787	IFIT3/IFIT1/TRIM6	3
BP	GO:0048525	negative regulation of viral process	3/111	99/18670	0.0212416	0.478991	0.461787	IFIT1/TRIM59/TRIM6	3
BP	GO:0030111	regulation of Wnt signaling pathway	6/111	363/18670	0.0213571	0.478991	0.461787	GNAQ/MCC/PTPRO/TSC2/JUP/TMEM64	6
BP	GO:0006656	phosphatidylcholine biosynthetic process	2/111	38/18670	0.0214246	0.478991	0.461787	RAB38/LCAT	2
BP	GO:0010038	response to metal ion	6/111	364/18670	0.0216132	0.478991	0.461787	FSTL3/MEF2C/TRPM2/STIM1/SYT1/FOSB	6
BP	GO:0022406	membrane docking	4/111	178/18670	0.0217455	0.478991	0.461787	RAB8B/STXBP2/SYT1/PDZD8	4
BP	GO:0090174	organelle membrane fusion	3/111	100/18670	0.0218059	0.478991	0.461787	RAB8B/SYT1/PRRT2	3
BP	GO:0055074	calcium ion homeostasis	7/111	471/18670	0.0224059	0.478991	0.461787	TRPM2/NOL3/STIM1/TMEM64/LYN/PDZD8/SYNPO	7
BP	GO:0043534	blood vessel endothelial cell migration	4/111	180/18670	0.022546	0.478991	0.461787	MEF2C/JUP/ANGPT2/HDAC5	4
BP	GO:0045165	cell fate commitment	5/111	270/18670	0.0226222	0.478991	0.461787	FKBP8/MEF2C/PRRX1/ESRP1/LEO1	5
BP	GO:0035690	cellular response to drug	6/111	369/18670	0.022925	0.478991	0.461787	BAIAP2/GNAQ/MEF2C/TRPM2/JUP/KLF2	6
BP	GO:0032868	response to insulin	5/111	272/18670	0.0232639	0.478991	0.461787	BAIAP2/RAB8B/TSC2/LYN/HDAC5	5
BP	GO:0001709	cell fate determination	2/111	40/18670	0.0235896	0.478991	0.461787	MEF2C/PRRX1	2
BP	GO:0002040	sprouting angiogenesis	4/111	183/18670	0.0237801	0.478991	0.461787	CREB3L1/RAMP2/HDAC5/KLF2	4
BP	GO:1901343	negative regulation of vasculature development	4/111	187/18670	0.0254885	0.478991	0.461787	CREB3L1/ANGPT2/HDAC5/KLF2	4
BP	GO:0033003	regulation of mast cell activation	2/111	42/18670	0.0258406	0.478991	0.461787	STXBP2/LYN	2
BP	GO:0097028	dendritic cell differentiation	2/111	42/18670	0.0258406	0.478991	0.461787	TRPM2/LYN	2
BP	GO:0006275	regulation of DNA replication	3/111	108/18670	0.0266146	0.478991	0.461787	SLFN11/DACH1/RFC4	3
BP	GO:0015696	ammonium transport	3/111	108/18670	0.0266146	0.478991	0.461787	SLC25A29/SYT1/LYN	3
BP	GO:0006904	vesicle docking involved in exocytosis	2/111	43/18670	0.0269975	0.478991	0.461787	RAB8B/STXBP2	2
BP	GO:1901653	cellular response to peptide	6/111	385/18670	0.0274812	0.478991	0.461787	BAIAP2/RAB8B/TSC2/LYN/HDAC5/KLF2	6
BP	GO:0072503	cellular divalent inorganic cation homeostasis	7/111	493/18670	0.0278288	0.478991	0.461787	TRPM2/NOL3/STIM1/TMEM64/LYN/PDZD8/SYNPO	7
BP	GO:0060828	regulation of canonical Wnt signaling pathway	5/111	286/18670	0.0280875	0.478991	0.461787	GNAQ/MCC/PTPRO/JUP/TMEM64	5
BP	GO:0035850	epithelial cell differentiation involved in kidney development	2/111	44/18670	0.0281751	0.478991	0.461787	MEF2C/PTPRO	2
BP	GO:0032970	regulation of actin filament-based process	6/111	388/18670	0.0283977	0.478991	0.461787	BAIAP2/MEF2C/PICK1/TRPM2/JUP/SYNPO	6
BP	GO:0001974	blood vessel remodeling	2/111	45/18670	0.029373	0.478991	0.461787	MEF2C/NOL3	2
BP	GO:0032570	response to progesterone	2/111	45/18670	0.029373	0.478991	0.461787	RAMP2/FOSB	2
BP	GO:0048701	embryonic cranial skeleton morphogenesis	2/111	45/18670	0.029373	0.478991	0.461787	MEF2C/PRRX1	2
BP	GO:0071827	plasma lipoprotein particle organization	2/111	45/18670	0.029373	0.478991	0.461787	LCAT/PLA2G7	2
BP	GO:0034330	cell junction organization	5/111	290/18670	0.029574	0.478991	0.461787	PTPRO/RAB8B/RAMP2/ITGB4/JUP	5
BP	GO:0010632	regulation of epithelial cell migration	5/111	291/18670	0.0299533	0.478991	0.461787	MCC/MEF2C/JUP/ANGPT2/HDAC5	5
BP	GO:0030218	erythrocyte differentiation	3/111	114/18670	0.0305634	0.478991	0.461787	LYAR/LYN/KLF2	3
BP	GO:0043300	regulation of leukocyte degranulation	2/111	46/18670	0.0305909	0.478991	0.461787	STXBP2/LYN	2
BP	GO:0071675	regulation of mononuclear cell migration	2/111	46/18670	0.0305909	0.478991	0.461787	LYN/PLA2G7	2
BP	GO:0017038	protein import	4/111	199/18670	0.0310495	0.478991	0.461787	RAB8B/TSC2/JUP/NUP107	4
BP	GO:0043303	mast cell degranulation	2/111	47/18670	0.0318287	0.478991	0.461787	STXBP2/LYN	2
BP	GO:0048066	developmental pigmentation	2/111	47/18670	0.0318287	0.478991	0.461787	MEF2C/RAB38	2
BP	GO:0050890	cognition	5/111	296/18670	0.0318958	0.478991	0.461787	MEF2C/TTC8/FEN1/NRGN/SYNPO	5
BP	GO:0002761	regulation of myeloid leukocyte differentiation	3/111	117/18670	0.0326472	0.478991	0.461787	FSTL3/TMEM64/LYN	3
BP	GO:0002279	mast cell activation involved in immune response	2/111	48/18670	0.0330859	0.478991	0.461787	STXBP2/LYN	2
BP	GO:0002762	negative regulation of myeloid leukocyte differentiation	2/111	48/18670	0.0330859	0.478991	0.461787	FSTL3/LYN	2
BP	GO:0072666	establishment of protein localization to vacuole	2/111	48/18670	0.0330859	0.478991	0.461787	AP3M1/VPS37B	2
BP	GO:1903727	positive regulation of phospholipid metabolic process	2/111	48/18670	0.0330859	0.478991	0.461787	RAB38/LYN	2
BP	GO:0045766	positive regulation of angiogenesis	4/111	204/18670	0.0335617	0.478991	0.461787	RAMP2/JUP/STIM1/ANGPT2	4
BP	GO:0002448	mast cell mediated immunity	2/111	49/18670	0.0343624	0.478991	0.461787	STXBP2/LYN	2
BP	GO:0071825	protein-lipid complex subunit organization	2/111	49/18670	0.0343624	0.478991	0.461787	LCAT/PLA2G7	2
BP	GO:0050808	synapse organization	6/111	408/18670	0.0350271	0.478991	0.461787	BAIAP2/MEF2C/PICK1/PTPRO/SYNPO/SLITRK4	6
BP	GO:0050792	regulation of viral process	4/111	208/18670	0.0356547	0.478991	0.461787	VPS37B/IFIT1/TRIM59/TRIM6	4
BP	GO:0034656	nucleobase-containing small molecule catabolic process	2/111	50/18670	0.0356578	0.478991	0.461787	ENPP4/ENTPD2	2
BP	GO:0034101	erythrocyte homeostasis	3/111	122/18670	0.0362811	0.478991	0.461787	LYAR/LYN/KLF2	3
BP	GO:0030178	negative regulation of Wnt signaling pathway	4/111	210/18670	0.0367291	0.478991	0.461787	MCC/PTPRO/TSC2/TMEM64	4
BP	GO:0007043	cell-cell junction assembly	3/111	124/18670	0.0377907	0.478991	0.461787	PTPRO/RAMP2/JUP	3
BP	GO:0048284	organelle fusion	3/111	124/18670	0.0377907	0.478991	0.461787	RAB8B/SYT1/PRRT2	3
BP	GO:0051209	release of sequestered calcium ion into cytosol	3/111	124/18670	0.0377907	0.478991	0.461787	TRPM2/NOL3/LYN	3
BP	GO:0051283	negative regulation of sequestering of calcium ion	3/111	126/18670	0.0393321	0.478991	0.461787	TRPM2/NOL3/LYN	3
BP	GO:0010810	regulation of cell-substrate adhesion	4/111	215/18670	0.0394963	0.478991	0.461787	PTPRO/JUP/ANGPT2/EMILIN3	4
BP	GO:0006376	mRNA splice site selection	2/111	53/18670	0.0396553	0.478991	0.461787	NOL3/PSIP1	2
BP	GO:0032869	cellular response to insulin stimulus	4/111	216/18670	0.0400637	0.478991	0.461787	BAIAP2/RAB8B/TSC2/HDAC5	4
BP	GO:0017157	regulation of exocytosis	4/111	217/18670	0.0406357	0.478991	0.461787	RAB8B/STXBP2/SYT1/LYN	4
BP	GO:0050920	regulation of chemotaxis	4/111	217/18670	0.0406357	0.478991	0.461787	PTPRO/ANGPT2/LYN/PLA2G7	4
BP	GO:0051282	regulation of sequestering of calcium ion	3/111	128/18670	0.0409051	0.478991	0.461787	TRPM2/NOL3/LYN	3
BP	GO:0050807	regulation of synapse organization	4/111	218/18670	0.0412124	0.478991	0.461787	BAIAP2/MEF2C/PTPRO/SLITRK4	4
BP	GO:0002886	regulation of myeloid leukocyte mediated immunity	2/111	55/18670	0.0424103	0.478991	0.461787	STXBP2/LYN	2
BP	GO:0010823	negative regulation of mitochondrion organization	2/111	55/18670	0.0424103	0.478991	0.461787	TSC2/NOL3	2
BP	GO:0071375	cellular response to peptide hormone stimulus	5/111	321/18670	0.0427827	0.478991	0.461787	BAIAP2/RAB8B/TSC2/LYN/HDAC5	5
BP	GO:0051208	sequestering of calcium ion	3/111	131/18670	0.0433236	0.478991	0.461787	TRPM2/NOL3/LYN	3
BP	GO:0043903	regulation of symbiosis, encompassing mutualism through parasitism	4/111	222/18670	0.0435658	0.478991	0.461787	VPS37B/IFIT1/TRIM59/TRIM6	4
BP	GO:0086065	cell communication involved in cardiac conduction	2/111	56/18670	0.043814	0.478991	0.461787	JUP/ATP1B2	2
BP	GO:0030595	leukocyte chemotaxis	4/111	224/18670	0.0447704	0.478991	0.461787	PTPRO/TRPM2/LYN/PLA2G7	4
BP	GO:0007224	smoothened signaling pathway	3/111	133/18670	0.044975	0.478991	0.461787	FKBP8/GLIS2/PRRX1	3
BP	GO:0009581	detection of external stimulus	3/111	133/18670	0.044975	0.478991	0.461787	GNAQ/JUP/METAP1	3
BP	GO:0042391	regulation of membrane potential	6/111	434/18670	0.04504	0.478991	0.461787	BAIAP2/GNAQ/MEF2C/PXK/JUP/ATP1B2	6
BP	GO:0075733	intracellular transport of virus	2/111	57/18670	0.0452349	0.478991	0.461787	VPS37B/NUP107	2
BP	GO:0000724	double-strand break repair via homologous recombination	3/111	134/18670	0.0458123	0.478991	0.461787	FEN1/MCM4/RBBP8	3
BP	GO:0019058	viral life cycle	5/111	328/18670	0.0461876	0.478991	0.461787	VPS37B/IFIT1/NUP107/TRIM59/TRIM6	5
BP	GO:0050803	regulation of synapse structure or activity	4/111	227/18670	0.0466123	0.478991	0.461787	BAIAP2/MEF2C/PTPRO/SLITRK4	4
BP	GO:0000725	recombinational repair	3/111	135/18670	0.0466574	0.478991	0.461787	FEN1/MCM4/RBBP8	3
BP	GO:0060359	response to ammonium ion	3/111	135/18670	0.0466574	0.478991	0.461787	GNAQ/FOSB/HDAC5	3
BP	GO:0009582	detection of abiotic stimulus	3/111	136/18670	0.0475102	0.478991	0.461787	GNAQ/JUP/METAP1	3
BP	GO:0010594	regulation of endothelial cell migration	4/111	229/18670	0.0478634	0.478991	0.461787	MEF2C/JUP/ANGPT2/HDAC5	4
BP	GO:0007602	phototransduction	2/111	59/18670	0.0481271	0.478991	0.461787	GNAQ/METAP1	2
BP	GO:0031102	neuron projection regeneration	2/111	59/18670	0.0481271	0.478991	0.461787	PRRX1/DHFR	2
BP	GO:0045071	negative regulation of viral genome replication	2/111	59/18670	0.0481271	0.478991	0.461787	IFIT1/TRIM6	2
BP	GO:0070527	platelet aggregation	2/111	59/18670	0.0481271	0.478991	0.461787	LYN/METAP1	2
BP	GO:1903670	regulation of sprouting angiogenesis	3/111	137/18670	0.0483706	0.478991	0.461787	CREB3L1/HDAC5/KLF2	3
BP	GO:1904018	positive regulation of vasculature development	4/111	230/18670	0.0484959	0.478991	0.461787	RAMP2/JUP/STIM1/ANGPT2	4
BP	GO:0045576	mast cell activation	2/111	60/18670	0.049598	0.478991	0.461787	STXBP2/LYN	2
BP	GO:0046794	transport of virus	2/111	60/18670	0.049598	0.478991	0.461787	VPS37B/NUP107	2
BP	GO:0060070	canonical Wnt signaling pathway	5/111	335/18670	0.0497503	0.478991	0.461787	GNAQ/MCC/PTPRO/JUP/TMEM64	5
CC	GO:0098984	neuron to neuron synapse	9/115	350/19717	0.000212964	0.0385771	0.0335765	BAIAP2/PICK1/PTPRO/TSC2/SYT1/LYN/NRGN/SYNPO/PRRT2	9
CC	GO:0009898	cytoplasmic side of plasma membrane	6/115	154/19717	0.00028764	0.0385771	0.0335765	CBX6/GNAQ/GNG10/JUP/LYN/NPTXR	6
CC	GO:0098562	cytoplasmic side of membrane	6/115	178/19717	0.000620957	0.0385771	0.0335765	CBX6/GNAQ/GNG10/JUP/LYN/NPTXR	6
CC	GO:0014069	postsynaptic density	8/115	324/19717	0.000629149	0.0385771	0.0335765	BAIAP2/PICK1/PTPRO/TSC2/LYN/NRGN/SYNPO/PRRT2	8
CC	GO:0032279	asymmetric synapse	8/115	328/19717	0.000681575	0.0385771	0.0335765	BAIAP2/PICK1/PTPRO/TSC2/LYN/NRGN/SYNPO/PRRT2	8
CC	GO:0099572	postsynaptic specialization	8/115	348/19717	0.000999214	0.0411468	0.0358131	BAIAP2/PICK1/PTPRO/TSC2/LYN/NRGN/SYNPO/PRRT2	8
CC	GO:0098978	glutamatergic synapse	8/115	349/19717	0.00101776	0.0411468	0.0358131	BAIAP2/PTPRO/SYT1/LYN/NPTXR/NRGN/SYNPO/SLITRK4	8
CC	GO:0044233	Mitochondria-associated ER Membrane	2/115	13/19717	0.00252225	0.0892247	0.0776589	RAB38/PDZD8	2
CC	GO:0043197	dendritic spine	5/115	169/19717	0.00313507	0.0933054	0.0812106	BAIAP2/PTPRO/NRGN/SYNPO/PRRT2	5
CC	GO:0044309	neuron spine	5/115	171/19717	0.00329701	0.0933054	0.0812106	BAIAP2/PTPRO/NRGN/SYNPO/PRRT2	5
CC	GO:0008021	synaptic vesicle	5/115	191/19717	0.0052634	0.132478	0.115306	PICK1/RAB8B/C16orf70/SYT1/PRRT2	5
CC	GO:0044232	organelle membrane contact site	2/115	20/19717	0.00598249	0.132478	0.115306	RAB38/PDZD8	2
CC	GO:0099091	postsynaptic specialization, intracellular component	2/115	21/19717	0.00658716	0.132478	0.115306	BAIAP2/LYN	2
CC	GO:0070382	exocytic vesicle	5/115	207/19717	0.0073453	0.132478	0.115306	PICK1/RAB8B/C16orf70/SYT1/PRRT2	5
CC	GO:0030667	secretory granule membrane	6/115	298/19717	0.00807524	0.132478	0.115306	ACRBP/ENPP4/STXBP2/TRPM2/CD109/SYT1	6
CC	GO:0030133	transport vesicle	7/115	392/19717	0.00814274	0.132478	0.115306	PICK1/RAB8B/YIPF2/C16orf70/SYT1/NRGN/PRRT2	7
CC	GO:0044306	neuron projection terminus	4/115	138/19717	0.00872817	0.132478	0.115306	BAIAP2/FSTL3/SYT1/PRRT2	4
CC	GO:0018995	host	3/115	73/19717	0.00893938	0.132478	0.115306	VPS37B/IFIT1/NUP107	3
CC	GO:0043657	host cell	3/115	73/19717	0.00893938	0.132478	0.115306	VPS37B/IFIT1/NUP107	3
CC	GO:0044215	other organism	3/115	77/19717	0.010339	0.132478	0.115306	VPS37B/IFIT1/NUP107	3
CC	GO:0044216	other organism cell	3/115	77/19717	0.010339	0.132478	0.115306	VPS37B/IFIT1/NUP107	3
CC	GO:0044217	other organism part	3/115	77/19717	0.010339	0.132478	0.115306	VPS37B/IFIT1/NUP107	3
CC	GO:0097730	non-motile cilium	4/115	149/19717	0.0113367	0.132478	0.115306	GLIS2/GNAQ/LYAR/TTC8	4
CC	GO:0016528	sarcoplasm	3/115	80/19717	0.0114675	0.132478	0.115306	MEF2C/NOL3/STIM1	3
CC	GO:0016234	inclusion body	3/115	82/19717	0.0122577	0.132478	0.115306	GYS1/PICK1/SLFN11	3
CC	GO:0005834	heterotrimeric G-protein complex	2/115	30/19717	0.0131874	0.132478	0.115306	GNAQ/GNG10	2
CC	GO:1905360	GTPase complex	2/115	30/19717	0.0131874	0.132478	0.115306	GNAQ/GNG10	2
CC	GO:0097060	synaptic membrane	7/115	432/19717	0.013382	0.132478	0.115306	BAIAP2/PICK1/PTPRO/SYT1/NRGN/SYNPO/PRRT2	7
CC	GO:0008305	integrin complex	2/115	31/19717	0.0140436	0.132478	0.115306	ITGB4/LYN	2
CC	GO:0030140	trans-Golgi network transport vesicle	2/115	31/19717	0.0140436	0.132478	0.115306	RAB8B/NRGN	2
CC	GO:0019897	extrinsic component of plasma membrane	4/115	165/19717	0.0159519	0.143219	0.124654	GNAQ/GNG10/JUP/LYN	4
CC	GO:0031234	extrinsic component of cytoplasmic side of plasma membrane	3/115	91/19717	0.0161943	0.143219	0.124654	GNAQ/GNG10/LYN	3
CC	GO:0098636	protein complex involved in cell adhesion	2/115	34/19717	0.0167521	0.143662	0.12504	ITGB4/LYN	2
CC	GO:0034358	plasma lipoprotein particle	2/115	37/19717	0.0196637	0.158995	0.138385	LCAT/PLA2G7	2
CC	GO:1990777	lipoprotein particle	2/115	37/19717	0.0196637	0.158995	0.138385	LCAT/PLA2G7	2
CC	GO:0032994	protein-lipid complex	2/115	39/19717	0.0217139	0.166865	0.145235	LCAT/PLA2G7	2
CC	GO:0030175	filopodium	3/115	104/19717	0.0229955	0.166865	0.145235	BAIAP2/CBX6/NPTXR	3
CC	GO:0030672	synaptic vesicle membrane	3/115	104/19717	0.0229955	0.166865	0.145235	C16orf70/SYT1/PRRT2	3
CC	GO:0099501	exocytic vesicle membrane	3/115	104/19717	0.0229955	0.166865	0.145235	C16orf70/SYT1/PRRT2	3
CC	GO:0016235	aggresome	2/115	43/19717	0.0260659	0.184416	0.160511	PICK1/SLFN11	2
CC	GO:0005913	cell-cell adherens junction	3/115	117/19717	0.0311232	0.214826	0.186979	BAIAP2/JUP/LYN	3
CC	GO:0030658	transport vesicle membrane	4/115	208/19717	0.0336276	0.226586	0.197215	C16orf70/SYT1/NRGN/PRRT2	4
CC	GO:0060076	excitatory synapse	2/115	50/19717	0.034444	0.22669	0.197305	BAIAP2/SYT1	2
CC	GO:0016324	apical plasma membrane	5/115	318/19717	0.0386775	0.248767	0.21652	PTPRO/SLC22A18/SLC9A3R2/STXBP2/ATP1B2	5
CC	GO:0045211	postsynaptic membrane	5/115	323/19717	0.0409071	0.25726	0.223913	PICK1/PTPRO/NRGN/SYNPO/PRRT2	5
CC	GO:0045335	phagocytic vesicle	3/115	132/19717	0.0421314	0.2592	0.225601	RAB8B/STXBP2/RAB38	3
CC	GO:0016328	lateral plasma membrane	2/115	57/19717	0.043716	0.263226	0.229105	PTPRO/JUP	2
CC	GO:0101003	ficolin-1-rich granule membrane	2/115	61/19717	0.0493832	0.281767	0.245243	ENPP4/TRPM2	2
CC	GO:0005802	trans-Golgi network	4/115	236/19717	0.0495158	0.281767	0.245243	PICK1/YIPF2/C16orf70/RAB38	4
MF	GO:0017075	syntaxin-1 binding	3/110	26/17697	0.000547413	0.177362	0.172867	STXBP2/SYT1/PRRT2	3
MF	GO:0071837	HMG box domain binding	2/110	16/17697	0.00434022	0.358423	0.34934	MEF2C/PRRX1	2
MF	GO:0008022	protein C-terminus binding	5/110	187/17697	0.00625344	0.358423	0.34934	BAIAP2/PICK1/SLC9A3R2/CALCOCO1/SYT1	5
MF	GO:0070491	repressing transcription factor binding	3/110	71/17697	0.00983171	0.358423	0.34934	TTC8/RBBP8/HDAC5	3
MF	GO:0019905	syntaxin binding	3/110	75/17697	0.0114102	0.358423	0.34934	STXBP2/SYT1/PRRT2	3
MF	GO:0003924	GTPase activity	6/110	324/17697	0.0157372	0.358423	0.34934	ARL4D/GNAQ/GNG10/RAB8B/DIRAS3/RAB38	6
MF	GO:0060090	molecular adaptor activity	5/110	237/17697	0.0162358	0.358423	0.34934	ARRDC1/BAIAP2/SLC9A3R2/CNKSR1/TRIM6	5
MF	GO:0001103	RNA polymerase II repressing transcription factor binding	2/110	35/17697	0.0199329	0.358423	0.34934	TTC8/RBBP8	2
MF	GO:0030674	protein binding, bridging	4/110	170/17697	0.0216158	0.358423	0.34934	ARRDC1/BAIAP2/CNKSR1/TRIM6	4
MF	GO:0005547	phosphatidylinositol-3,4,5-trisphosphate binding	2/110	39/17697	0.024429	0.358423	0.34934	ADAP1/NRGN	2
MF	GO:0004520	endodeoxyribonuclease activity	2/110	41/17697	0.0268179	0.358423	0.34934	FEN1/RBBP8	2
MF	GO:0005525	GTP binding	6/110	374/17697	0.0293033	0.358423	0.34934	ARL4D/GNAQ/MOCS1/RAB8B/DIRAS3/RAB38	6
MF	GO:0032550	purine ribonucleoside binding	6/110	378/17697	0.0306419	0.358423	0.34934	ARL4D/GNAQ/MOCS1/RAB8B/DIRAS3/RAB38	6
MF	GO:0000149	SNARE binding	3/110	110/17697	0.0312262	0.358423	0.34934	STXBP2/SYT1/PRRT2	3
MF	GO:0001883	purine nucleoside binding	6/110	381/17697	0.0316717	0.358423	0.34934	ARL4D/GNAQ/MOCS1/RAB8B/DIRAS3/RAB38	6
MF	GO:0032549	ribonucleoside binding	6/110	382/17697	0.03202	0.358423	0.34934	ARL4D/GNAQ/MOCS1/RAB8B/DIRAS3/RAB38	6
MF	GO:0001882	nucleoside binding	6/110	389/17697	0.0345282	0.358423	0.34934	ARL4D/GNAQ/MOCS1/RAB8B/DIRAS3/RAB38	6
MF	GO:0050839	cell adhesion molecule binding	7/110	499/17697	0.0361202	0.358423	0.34934	BAIAP2/PTPRO/SH3GLB2/SLC9A3R2/ITGB4/JUP/LYN	7
MF	GO:0019001	guanyl nucleotide binding	6/110	394/17697	0.0363957	0.358423	0.34934	ARL4D/GNAQ/MOCS1/RAB8B/DIRAS3/RAB38	6
MF	GO:0032561	guanyl ribonucleotide binding	6/110	394/17697	0.0363957	0.358423	0.34934	ARL4D/GNAQ/MOCS1/RAB8B/DIRAS3/RAB38	6
MF	GO:0098632	cell-cell adhesion mediator activity	2/110	50/17697	0.038649	0.358423	0.34934	BAIAP2/JUP	2
MF	GO:0000993	RNA polymerase II complex binding	2/110	53/17697	0.0429601	0.358423	0.34934	LEO1/PCIF1	2
MF	GO:0005080	protein kinase C binding	2/110	53/17697	0.0429601	0.358423	0.34934	PICK1/HDAC5	2
MF	GO:0140097	catalytic activity, acting on DNA	4/110	213/17697	0.0439445	0.358423	0.34934	FEN1/MCM4/RFC4/RBBP8	4
